# Supplementary material
Source: MDPI journal article supplement (https://www.mdpi.com/2071-1050/13/15/8150)
Supplement: s1 [file s1]

## Supplementary Material 2: Tables of Harmful subsidies for the circular economy (HCE) and Friendly subsidies for the circular economy (FCE)

**Table S1 - Energy sector – Harmful subsidies for the circular economy (HCE)**

| Subsidy code<br>(Catalogue) | Title                                                                                                                                                  | Environmental<br>qualification<br>(Catalogue) | CE<br>qualification<br>(CE principles<br>harmed by the<br>subsidy)                                                              | Financial impact (mln €) |          |          |
|-----------------------------|--------------------------------------------------------------------------------------------------------------------------------------------------------|-----------------------------------------------|---------------------------------------------------------------------------------------------------------------------------------|--------------------------|----------|----------|
|                             |                                                                                                                                                        |                                               |                                                                                                                                 | 2017                     | 2018     | 2019     |
| INDIRECT SUBSIDIES          |                                                                                                                                                        |                                               |                                                                                                                                 |                          |          |          |
| EN.SI.01                    | Riduzione dell'accisa sulle emulsioni di gasolio o olio combustibile in acqua impiegate come carburanti o combustibili                                 | EHS                                           | Minore efficienza nel consumo di risorse energetiche fossili                                                                    | 2,20                     | 2,20     | 2,20     |
| EN.SI.02                    | Esenzione dall'accisa sull'energia elettrica impiegata nelle abitazioni di residenza con potenza fino a 3 kW fino a 150 kWh di consumo mensile         | EHS                                           | Minore efficienza nel consumo di energia elettrica e, per la quota parte del mix di generazione, di risorse energetiche fossili | 634,08                   | 586,40   | 586,70   |
| EN.SI.03                    | Esenzione dall'imposta di consumo per gli oli lubrificanti impiegati nella produzione e nella lavorazione della gomma naturale e sintetica             | EHS                                           | Minore efficienza nel consumo di risorse energetiche fossili                                                                    | 1,00                     | 1,00     | 1,00     |
| EN.SI.04                    | Esenzione dall'accisa sui prodotti energetici impiegati come carburanti per la navigazione aerea diversa dall'aviazione privata e per i voli didattici | EHS                                           | Minore efficienza nel consumo di risorse energetiche fossili                                                                    | 1.807,30                 | 1.807,30 | 1.807,30 |
| EN.SI.05                    | Esenzione dall'accisa sui prodotti energetici impiegati come carburanti per la navigazione marittima                                                   | EHS                                           | Minore efficienza nel consumo di risorse energetiche fossili                                                                    | 460,90                   | 460,90   | 460,90   |
| EN.SI.07                    | Esenzione dall'accisa sui carburanti per il prosciugamento e la sistemazione dei terreni allagati nelle zone colpite da alluvione                      | EHS                                           | Minore efficienza nel consumo di risorse energetiche fossili                                                                    | 0,50                     | 0,50     | 0,50     |
| EN.SI.08                    | Esenzione dall'accisa sui carburanti per il sollevamento delle acque allo scopo di agevolare la coltivazione dei fondi rustici sui terreni bonificati  | EHS                                           | Minore efficienza nel consumo di risorse energetiche fossili                                                                    | 0,50                     | 0,50     | 0,50     |
| EN.SI.09                    | Riduzione dell'accisa sui carburanti per le prove sperimentali e collaudo di motori di aviazione e marina                                              | EHS                                           | Minore efficienza nel consumo di risorse energetiche fossili                                                                    | 0,50                     | 0,50     | 0,50     |
| EN.SI.10                    | Riduzione dell'accisa sul gas naturale impiegato negli usi di cantiere, nei motori fissi e nelle operazioni di campo per l'estrazione di idrocarburi   | EHS                                           | Minore efficienza nel consumo di risorse energetiche fossili                                                                    | 0,27                     | 0,27     | 0,20     |
| EN.SI.11                    | Esenzione dall'accisa sull'energia elettrica prodotta da impianti di gasificazione                                                                     | EHS                                           | Minore efficienza nel consumo di energia elettrica                                                                              | 0,50                     | 0,50     | 0,50     |
| EN.SI.12                    | Riduzione dell'aliquota normale dell'accisa sui carburanti per i Taxi                                                                                  | EHS                                           | Minore efficienza nel consumo di risorse energetiche fossili                                                                    | 10,80                    | 12,70    | 10,80    |
| EN.SI.13                    | Riduzione dell'accisa sui carburanti per le autoambulanze                                                                                              | EHS                                           | Minore efficienza nel consumo di risorse energetiche fossili                                                                    | 2,60                     | 2,40     | 2,40     |
| EN.SI.14                    | Esenzione dall'accisa sui prodotti energetici impiegati per la produzione di magnesio da acqua di mare                                                 | EHS                                           | Minore efficienza nel consumo di risorse energetiche fossili                                                                    | 0,50                     | 0,50     | 0,50     |
| EN.SI.15                    | Riduzione dell'accisa sul GPL utilizzato negli impianti centralizzati per usi industriali                                                              | EHS                                           | Minore efficienza nel consumo di risorse energetiche fossili                                                                    | 11,40                    | 14,50    | 12,60    |

|                                               |                                                                                                                                                                                     |                               |                                                                                                                                 |                 |                 |                 |
|-----------------------------------------------|-------------------------------------------------------------------------------------------------------------------------------------------------------------------------------------|-------------------------------|---------------------------------------------------------------------------------------------------------------------------------|-----------------|-----------------|-----------------|
| EN.SI.16                                      | Esenzione dall'accisa su prodotti energetici iniettati negli altiforni per la realizzazione dei processi produttivi                                                                 | EHS                           | Minore efficienza nel consumo di risorse energetiche fossili                                                                    | 1,00            | 1,00            | 1,00            |
| EN.SI.17                                      | Riduzione dei costi per le Forze armate nazionali                                                                                                                                   | EHS                           | Minore efficienza nel consumo di risorse energetiche fossili                                                                    | 29,60           | 47,60           | 23,20           |
| EN.SI.18                                      | Deduzione forfetaria dal reddito di impresa a favore degli esercenti impianti di distribuzione carburante                                                                           | EHS                           | Minore efficienza nel consumo di risorse energetiche fossili                                                                    | 86,00           | 41,20           | 40,30           |
| EN.SI.19                                      | Rimborso del maggior onere derivante dall'aumento dell'accisa sul gasolio impiegato come carburante per l'autotrasporto merci ed altre categorie di trasporto passeggeri            | EHS                           | Minore efficienza nel consumo di risorse energetiche fossili                                                                    | 1.257,34        | 1.264,40        | 1.587,50        |
| EN.SI.20                                      | Riduzione dell'accisa sul gas naturale impiegato per usi industriali termoelettrici esclusi, da soggetti che registrano consumi superiori a 1.200.000 mc annui                      | EHS                           | Minore efficienza nel consumo di risorse energetiche fossili                                                                    | 58,11           | 60,00           | 60,90           |
| EN.SI.21                                      | Impiego dei prodotti energetici nei lavori agricoli e assimilati                                                                                                                    | EHS                           | Minore efficienza nel consumo di risorse energetiche fossili                                                                    | 843,20          | 864,80          | 913,00          |
| EN.SI.22                                      | Gasolio e GPL impiegati per riscaldamento in aree geograficamente o climaticamente svantaggiate (zone montane, Sardegna, isole minori)                                              | EHS: diesel fuel;<br>EFS: LPG | Minore efficienza nel consumo di risorse energetiche fossili                                                                    | 159,60          | 152,80          | 152,80          |
| EN.SI.23                                      | Produzione, diretta o indiretta, di energia elettrica con impianti obbligati alla denuncia prevista dalle disposizioni che disciplinano l'imposta di consumo sull'energia elettrica | EHS                           | Minore efficienza nel consumo di risorse energetiche fossili                                                                    | 455,40          | 455,40          | 455,40          |
| EN.SI.25                                      | Riduzione accise sui prodotti energetici per le navi che fanno esclusivamente movimentazione all'interno del porto di transhipment                                                  | EHS                           | Minore efficienza nel consumo di risorse energetiche fossili                                                                    | 1,80            | 1,80            | 1,80            |
| EN.SI.26                                      | Franchigia sulle aliquote di prodotto della coltivazione di gas naturale e petrolio (royalties)                                                                                     | EHS                           | Maggior estrazione e consumo di risorse energetiche e fossili                                                                   | 52,00           | 52,00           | 52,00           |
| EN.SI.29                                      | Agevolazioni per le imprese a forte consumo di energia elettrica                                                                                                                    | EHS                           | Minore efficienza nel consumo di energia elettrica e, per la quota parte del mix di generazione, di risorse energetiche fossili | 580,00          | 580,00          | 580,00          |
| EN.SI.30                                      | Esenzione sul prelievo di energia elettrica per i clienti finali che prestano servizi di interrompibilità istantanea o di emergenza                                                 | EHS                           | Minore efficienza nel consumo di energia elettrica e, per la quota parte del mix di generazione, di risorse energetiche fossili | 98,00           | 98,00           | 98,00           |
| <b>Total HCE indirect subsidies in Energy</b> |                                                                                                                                                                                     |                               |                                                                                                                                 | <b>6.555,10</b> | <b>6.509,17</b> | <b>6.852,50</b> |
| <b>DIRECT SUBSIDIES</b>                       |                                                                                                                                                                                     |                               |                                                                                                                                 |                 |                 |                 |
| EN.SD.01                                      | Rilascio delle quote assegnate a titolo gratuito                                                                                                                                    | EHS                           | Minore efficienza nel consumo di risorse energetiche fossili                                                                    | 394,63          | 980,00          | 980,00          |
| <b>Total HCE direct subsidies in Energy</b>   |                                                                                                                                                                                     |                               |                                                                                                                                 | <b>394,63</b>   | <b>980,00</b>   | <b>980,00</b>   |
| <b>Total HCE subsidies in Energy</b>          |                                                                                                                                                                                     |                               |                                                                                                                                 | <b>6.949,73</b> | <b>7.489,17</b> | <b>7.832,50</b> |

**Table S2 – Transport sector’’: Harmful subsidies for circular economy (HCE)**

| Subsidy code<br>(Catalogue)               | Title                                                                                                                                                  | Environmental qualification<br>(Catalogue) | CE qualification<br>(CE principles harmed by the subsidy) | Financial impact (mln €) |          |          |
|-------------------------------------------|--------------------------------------------------------------------------------------------------------------------------------------------------------|--------------------------------------------|-----------------------------------------------------------|--------------------------|----------|----------|
|                                           |                                                                                                                                                        |                                            |                                                           | 2017                     | 2018     | 2019     |
| INDIRECT SUBSIDIES                        |                                                                                                                                                        |                                            |                                                           |                          |          |          |
| TR.SI.04                                  | Agevolazioni fiscali sui fringe benefit a favore del lavoratore che utilizza in maniera promiscua l'auto aziendale (company car lavoratore dipendente) | EHS                                        | Uso inefficiente delle risorse materiali ed energetiche   | 1.231,00                 | 1.231,00 | 1.231,00 |
| Total HCE indirect subsidies in Transport |                                                                                                                                                        |                                            |                                                           | 1.231,00                 | 1.231,00 | 1.231,00 |
| DIRECT SUBSIDIES                          |                                                                                                                                                        |                                            |                                                           |                          |          |          |
| TR.SD.05                                  | Fondo rottamazione carri merci                                                                                                                         | EFS                                        | Accorciamento della vita utile del prodotto               | -                        | 4,00     | 4,00     |
| Total HCE direct subsidies in Transport   |                                                                                                                                                        |                                            |                                                           | -                        | 4,00     | 74,00    |
| Total HCE subsidies in Transport”         |                                                                                                                                                        |                                            |                                                           | 1.231                    | 1.235    | 1.235    |

**Table S3 – “Other subsidies”: Harmful subsidies for the circular economy (HCE)**

| Subsidy code<br>(Catalogue)                            | Title                                                                                                                                                                       | Environmental qualification<br>(Catalogue) | CE qualification<br>(CE principles harmed by the subsidy)  | Financial impact (mln €) |               |               |
|--------------------------------------------------------|-----------------------------------------------------------------------------------------------------------------------------------------------------------------------------|--------------------------------------------|------------------------------------------------------------|--------------------------|---------------|---------------|
|                                                        |                                                                                                                                                                             |                                            |                                                            | 2017                     | 2018          | 2019          |
| <b>INDIRECT SUBSIDIES</b>                              |                                                                                                                                                                             |                                            |                                                            |                          |               |               |
| AL.SI.01                                               | Riduzione dell'aliquota massima TASI per i fabbricati costruiti e destinati dall'impresa costruttrice alla vendita                                                          | EHS                                        | Consumo di suolo                                           | d.q.                     | d.q.          | d.q.          |
| AL.SI.02                                               | Credito d'imposta per l'acquisto di beni strumentali nuovi destinati a strutture produttive nelle zone assistite ubicate nelle regioni del Mezzogiorno                      | EHS                                        | Uso inefficiente risorse energetiche fossili               | 617,00                   | 617,00        | 617,00        |
| AL.SI.03                                               | Esenzione IMU per i fabbricati costruiti e destinati dall'impresa costruttrice alla vendita                                                                                 | EHS                                        | Consumo di suolo                                           | 38,30                    | 38,30         | 38,30         |
| AL.SI.04                                               | Riduzione della tariffa ordinaria per i rifiuti smaltiti in impianti di incenerimento senza recupero di energia                                                             | EHS                                        | Incenerimento rifiuti senza recupero energia               | d.q.                     | d.q.          | d.q.          |
| AL.SI.05                                               | A agevolazione tariffaria per la prima fascia di consumo d'acqua                                                                                                            | EHS                                        | Uso inefficiente acqua potabile                            | d.q.                     | d.q.          | d.q.          |
| AL.SI.07                                               | Deroga nella definizione della quota variabile del servizio di acquedotto in considerazione dell'effettiva numerosità dei componenti di ciascuna utenza domestica residente | EHS                                        | Uso inefficiente acqua potabile                            | -                        | d.q.          | d.q.          |
| AL.SI.08                                               | Garanzie sul credito all'esportazione per impianti di produzione di energia alimentati a carbone, petrolio e gas naturale nei paesi terzi                                   | EHS                                        | Uso inefficiente risorse energetiche fossili               | d.q.                     | d.q.          | d.q.          |
| AL.SI.09                                               | Riduzione base imponibile ai fini IMU e TASI, rigassificatori off shore                                                                                                     | EHS                                        | Uso inefficiente risorse energetiche fossili               | d.q.                     | d.q.          | d.q.          |
| AL.SI.06                                               | Bonus idrico sociale                                                                                                                                                        | EUS                                        | Uso inefficiente acqua potabile                            | -                        | d.q.          | d.q.          |
| AL.SI.12                                               | Deduzione IRPEF di alcuni costi relativi al contratto di locazione finanziaria di immobili                                                                                  | EUS                                        | Consumo di suolo                                           | 15,20                    | 20,90         | 0,10          |
| <b>Total HCE indirect subsidies in Other subsidies</b> |                                                                                                                                                                             |                                            |                                                            | <b>670,50</b>            | <b>676,20</b> | <b>655,40</b> |
| <b>DIRECT SUBSIDIES</b>                                |                                                                                                                                                                             |                                            |                                                            |                          |               |               |
| AL.SD.01                                               | Estrazione del sale dai giacimenti da parte dei privati, esenzione dal canone di concessione                                                                                | EFS                                        | Uso inefficiente della risorsa, aumento produzione rifiuti | -                        | d.q.          | d.q.          |
| AL.SD.02                                               | Disposizioni in materia di morosità nel servizio idrico integrato                                                                                                           | EUS                                        | Uso inefficiente acqua potabile                            | d.q.                     | d.q.          | d.q.          |
| <b>Total HCE direct subsidies in Other subsidies</b>   |                                                                                                                                                                             |                                            |                                                            | d.q.                     | d.q.          | d.q.          |
| <b>Total HCE subsidies in Other subsidies</b>          |                                                                                                                                                                             |                                            |                                                            | <b>670,50</b>            | <b>676,20</b> | <b>655,40</b> |
| NOTE<br>d.q: da quantificare (to be quantified)        |                                                                                                                                                                             |                                            |                                                            |                          |               |               |

**Table S4 – “VAT allowances”: Harmful subsidies for the circular economy (HCE)**

| Subsidy code (Catalogue)    | Title                                                                                                                                    | Environmental qualification (Catalogue) | CE qualification (CE principles harmed by the subsidy)                                                                                                                                                                                                   | Financial impact (mln €) |                 |                 |
|-----------------------------|------------------------------------------------------------------------------------------------------------------------------------------|-----------------------------------------|----------------------------------------------------------------------------------------------------------------------------------------------------------------------------------------------------------------------------------------------------------|--------------------------|-----------------|-----------------|
|                             |                                                                                                                                          |                                         |                                                                                                                                                                                                                                                          | 2017                     | 2018            | 2019            |
| IVA.01                      | IVA agevolata 4% per la cessione, da imprese costruttrici e non, di case di abitazione, non di lusso, prima casa per acquirente          | EHS                                     | Consumo di suolo, maggior consumo di risorse materiali a causa di nuova costruzione invece che ristrutturazione                                                                                                                                          | d.q.                     | d.q.            | d.q.            |
| IVA.02                      | IVA agevolata 4% per prestazioni di servizi dipendenti da contratti di appalto relativi alla costruzione dei fabbricati                  | EHS                                     | Consumo di suolo, maggior consumo di risorse materiali a causa di nuova costruzione invece che ristrutturazione                                                                                                                                          | d.q.                     | d.q.            | d.q.            |
| <b>Total HCE in VAT 4%</b>  |                                                                                                                                          |                                         |                                                                                                                                                                                                                                                          | <b>d.q.</b>              | <b>d.q.</b>     | <b>d.q.</b>     |
| IVA.06                      | IVA agevolata 10% per acqua e acque minerali (vedi nota)                                                                                 | EHS                                     | Riduzione dell'efficienza d'uso di risorsa naturale (acqua)                                                                                                                                                                                              | 681,80                   | 366,51          | 366,51(*)       |
| IVA.07                      | IVA agevolata 10% per l'energia elettrica per uso domestico                                                                              | EHS                                     | Minore efficienza d'uso dell'energia elettrica, maggiori consumi di risorse naturali energetiche, materiali e idriche (dovuti alla maggior produzione di elettricità)                                                                                    | 1.663,79                 | 1.765,14        | 1.779,98        |
| IVA.08                      | IVA agevolata 10% per l'energia elettrica e gas per uso di imprese estrattive, agricole e manifatturiere                                 | EHS                                     | Minore efficienza d'uso dell'energia elettrica, maggiori consumi di risorse naturali energetiche, materiali e idriche                                                                                                                                    | 1.329,00                 | 1.329,00        | 1.329,00        |
| IVA.09                      | IVA agevolata 10% per oli minerali greggi, oli combustibili                                                                              | EHS                                     | Maggiori consumi di risorse naturali energetiche fossili                                                                                                                                                                                                 | d.q.                     | d.q.            | d.q.            |
| IVA.10                      | IVA agevolata 10% per prodotti petroliferi per uso agricolo e per la pesca in acque interne                                              | EHS                                     | Maggiori consumi di risorse naturali energetiche fossili                                                                                                                                                                                                 | 183,03                   | 221,02          | 221,02(*)       |
| IVA.11                      | IVA agevolata 10% per gas metano e GPL impiegati per usi domestici di cottura e la produzione di acqua calda                             | EHS                                     | Maggiori consumi di risorse naturali energetiche fossili                                                                                                                                                                                                 | d.q.                     | d.q.            | d.q.            |
| IVA.12                      | IVA agevolata 10% per somministrazione di gas metano usato per combustione per usi civili limitatamente a 480 metri cubi annui           | EHS                                     | Maggiori consumi di risorse naturali energetiche fossili                                                                                                                                                                                                 | d.q.                     | d.q.            | d.q.            |
| IVA.13                      | IVA agevolata 10% per case di abitazione non di lusso                                                                                    | EHS                                     | Consumo di suolo, maggior consumo di risorse materiali a causa di nuova costruzione invece che ristrutturazione                                                                                                                                          | d.q.                     | d.q.            | d.q.            |
| IVA.14 a)                   | IVA agevolata 10% per prestazioni di servizi dipendenti dai seguenti tipi di contratti di appalto: a) costruzione di case di abitazione; | EHS                                     | Maggior consumo di suolo e risorse materiali                                                                                                                                                                                                             | d.q.                     | d.q.            | d.q.            |
| IVA.15                      | IVA agevolata 10% per prodotti fitosanitari                                                                                              | EHS                                     | Uso meno efficiente di risorse naturali scarse; incremento dell'uso di sostanze chimiche pericolose che ostacolano il riutilizzo e riciclaggio dei sottoprodotti e residui agricoli e dei rifiuti animali (es. farine animali per alimentazione animale) | 206,35                   | 91,96           | 91,96           |
| IVA.16                      | IVA agevolata 10% per prodotti di origine minerale e chimico-industriale ed additivi per la nutrizione degli animali                     | EHS                                     | Uso meno efficiente di risorse naturali scarse                                                                                                                                                                                                           | 12,13                    | 11,67.          | 11,67           |
| IVA.17                      | IVA agevolata 10% per le prestazioni di smaltimento in discarica (e per l'incenerimento senza recupero efficiente di energia).           | EHS                                     | In contrasto con la gerarchia dei rifiuti che vede prioritariamente il recupero, riuso e riciclaggio                                                                                                                                                     | d.q.                     | d.q.            | d.q.            |
| <b>Total HCE in VAT 10%</b> |                                                                                                                                          |                                         |                                                                                                                                                                                                                                                          | <b>4.076,10</b>          | <b>3.773,63</b> | <b>3.800,14</b> |

| Subsidy code<br>(Catalogue)                                                                  | Title | Environmental qualification<br>(Catalogue) | CE qualification (CE principles harmed by the subsidy) | Financial impact (mln €) |                 |                 |
|----------------------------------------------------------------------------------------------|-------|--------------------------------------------|--------------------------------------------------------|--------------------------|-----------------|-----------------|
| <b>Total HCE in “VAT allowance”</b>                                                          |       |                                            |                                                        | <b>4.076,10</b>          | <b>3.773,63</b> | <b>3.800,14</b> |
| NOTE                                                                                         |       |                                            |                                                        |                          |                 |                 |
| d.q: da quantificare (to be quantified)                                                      |       |                                            |                                                        |                          |                 |                 |
| (*): Not quantified by the Catalogue for 2019. In the CE analysis the 2018 value is adopted. |       |                                            |                                                        |                          |                 |                 |

**Table S5 - “Energy sector” – Friendly subsidies for the circular economy (FCE)**

[illegible]

**Table S6 - "Transport sector" – Friendly subsidies for circular economy (FCE)**

[illegible]



**Table S7 - “Agriculture & Fisheries” – Friendly subsidies for the circular economy (FCE)**

| Subsidy code (Catalogue)                               | Title                                                                                                                                                               | Environmental qualification (Catalogue) | CE qualification (CE principles favoured by the subsidy)                                                   | Financial impact (mln €) |             |             |
|--------------------------------------------------------|---------------------------------------------------------------------------------------------------------------------------------------------------------------------|-----------------------------------------|------------------------------------------------------------------------------------------------------------|--------------------------|-------------|-------------|
|                                                        |                                                                                                                                                                     |                                         |                                                                                                            | 2017                     | 2018        | 2019        |
| AP.SI.04                                               | Regime di detrazione forfettizzata al 50% dell'IVA per le attività di agriturismo                                                                                   | EFS                                     | Previene il consumo della risorsa suolo                                                                    | 3,80                     | 2,10        | 0,80        |
| AP.SI.05                                               | Apicoltura in aree montane                                                                                                                                          | EFS                                     | Risparmio di risorse energetiche e materiali                                                               | -                        | 1,80        | 1,80        |
| <b>Total indirect FCE in Agriculture and Fisheries</b> |                                                                                                                                                                     |                                         |                                                                                                            | <b>3,80</b>              | <b>3,90</b> | <b>2,60</b> |
| AP.SD.03                                               | Sostegno specifico per la zootecnia bovina da carne: macellazione bovini                                                                                            | EHS                                     | Riduce l'uso di materie prime chimiche (fertilizzanti) mediante il riutilizzo di residui biologici         | 73,22                    | 72,31       | 71,39       |
| AP.SD.08                                               | Misure per la competitività delle filiere agricole strategiche e per il rilancio del settore olivicolo nelle aree colpite da Xylella fastidiosa                     | EHS                                     | Allunga la vita utile del sistema colturale e previene l'urbanizzazione (consumo di suolo)                 | -                        | 1,00        | 1,00        |
| AP.SD.09                                               | Sostegno specifico per la zootecnia bovina da latte                                                                                                                 | EHS                                     | Riduce l'uso di materie prime chimiche (fertilizzanti) mediante il riutilizzo di residui biologici         | 85,63                    | 84,55       | 83,48       |
| AP.SD.10                                               | Sostegno specifico per la zootecnia bufalina da latte                                                                                                               | EHS                                     | Riduce l'uso di materie prime chimiche (fertilizzanti) mediante il riutilizzo di residui biologici         | 4,01                     | 3,96        | 3,91        |
| AP.SD.11                                               | Sostegno specifico per la zootecnia bovina da latte in zone montane                                                                                                 | EUS                                     | Riduce l'uso di materie prime chimiche (fertilizzanti) mediante il riutilizzo di residui biologici         | 11,13                    | 10,99       | 10,85       |
| AP.SD.17                                               | Pagamento per le pratiche agricole benefiche per il clima e l'ambiente                                                                                              | EUS                                     | Allungamento della vita dei suoli naturali, prevenzione del Consumo di risorsa suolo d'interesse ecologico | 1.139,86                 | 1.125,58    | 1.111,30    |
| AP.SD.18                                               | Pagamento per i giovani agricoltori                                                                                                                                 | EUS                                     | Prevenzione del consumo di suolo naturale                                                                  | 38,00                    | 37,52       | 37,04       |
| AP.SD.19                                               | Sostegno specifico: premio base olivo                                                                                                                               | EUS                                     | Allungamento della vita di un sistema colturale tradizionale, previene il consumo di suolo naturale        | 43,04                    | 42,50       | 41,96       |
| AP.SD.20                                               | Sostegno specifico per la zootecnia bovina da carne: vacche nutrici                                                                                                 | EUS                                     | Prevenzione del consumo di suolo naturale                                                                  | 47,65                    | 47,05       | 46,45       |
| AP.SD.21                                               | Sostegno specifico per la zootecnica ovino-caprina                                                                                                                  | EUS                                     | Prevenzione del consumo di suolo naturale                                                                  | 14,64                    | 14,45       | 14,27       |
| AP.SD.01                                               | Indennità giornaliera per i lavoratori dipendenti da imprese adibite alla pesca marittima nei periodi di fermo obbligatorio                                         | EFS                                     | Riduzione del consumo di risorse ittiche naturali                                                          | -                        | -           | -           |
| AP.SD.22                                               | Misura 2 PSR 2014-2020: Servizi di consulenza, di sostituzione e di assistenza alla gestione delle aziende agricole                                                 | EFS                                     | Uso razionale delle risorse, prevenzione dei rifiuti                                                       | 0,18                     | 9,46        | 20,81       |
| AP.SD.23                                               | Misura 3 PSR 2014-2020: Regimi di qualità dei prodotti agricoli e alimentari                                                                                        | EFS                                     | Uso razionale delle risorse, prevenzione dei rifiuti                                                       | 8,74                     | 7,60        | 19,01       |
| AP.SD.24                                               | Misura 5 PSR 2014-2020: Ripristino del potenziale agricolo danneggiato da calamità naturali ed eventi catastrofici e introduzione di adeguate misure di prevenzione | EFS                                     | Riparazione e ripristino di sistemi colturali                                                              | 1,50                     | 0,69        | 14,96       |
| AP.SD.25                                               | Misura 8 PSR 2014-2020: Investimenti nello sviluppo delle aree forestali e nel miglioramento della redditività delle foreste                                        | EFS                                     | Uso sostenibile della risorsa legno                                                                        | 49,95                    | 120,76      | 174,42      |
| AP.SD.26                                               | Misura 10 PSR 2014-2020: Pagamenti agro-climatico-ambientali                                                                                                        | EFS                                     | Allungamento della vita di sistemi colturali, prevenzione del consumo di suolo d'interesse ecologico       | 304,91                   | 354,70      | 329,36      |
| AP.SD.27                                               | Misura 11 PSR 2014-2020: Agricoltura biologica                                                                                                                      | EFS                                     | Riduzione dell'uso di prodotti chimici e riutilizzo dei residui organici                                   | 317,93                   | 244,65      | 227,18      |
| AP.SD.28                                               | Misura 12 PSR 2014-2020: Indennità Natura 2000 e indennità connesse alla direttiva quadro sulle acque                                                               | EFS                                     | Allungamento della vita di ecosistemi di pregio e prevenzione del consumo di suolo                         | 0,53                     | 5,05        | 7,08        |

| Subsidy code<br>(Catalogue)                             | Title                                                                                                                                                                                      | Environmental qualification<br>(Catalogue) | CE qualification (CE principles favoured by the subsidy)                                    | Financial impact (mln €) |                 |                 |
|---------------------------------------------------------|--------------------------------------------------------------------------------------------------------------------------------------------------------------------------------------------|--------------------------------------------|---------------------------------------------------------------------------------------------|--------------------------|-----------------|-----------------|
|                                                         |                                                                                                                                                                                            |                                            |                                                                                             | 2017                     | 2018            | 2019            |
| AP.SD.29                                                | Misura 13 PSR 2014-2020: Indennità a favore di zone soggette a vincoli naturali o ad altri vincoli specifici                                                                               | EFS                                        | Allungamento della vita di ecosistemi di pregio e prevenzione del consumo di suolo          | 300,00                   | 154,99          | 154,99          |
| AP.SD.30                                                | Misura 15 PSR 2014-2020: Servizi silvi-ambientali e climatici a salvaguardia delle foreste                                                                                                 | EFS                                        | Allungamento della vita di ecosistemi di pregio e prevenzione del consumo di suolo          | 2,18                     | 2,55            | 5,61            |
| AP.SD.32                                                | Sostegno specifico: premio aggiuntivo olio                                                                                                                                                 | EFS                                        | Allungamento della vita di sistemi colturali tradizionali, prevenzione del consumo di suolo | 12,95                    | 12,79           | 12,62           |
| AP.SD.33                                                | Misura premi per il settore olio di oliva, di particolare rilevanza economica, sociale, territoriale e ambientale. Superfici olivicole che aderiscono a sistemi di qualità                 | EFS                                        | Allungamento della vita di sistemi colturali tradizionali, prevenzione del consumo di suolo | 12,54                    | 12,38           | 12,22           |
| AP.SD.34                                                | Programma di sostegno nel settore vitivinicolo - Ristrutturazione e riconversione dei vigneti                                                                                              | EFS                                        | Allungamento della vita di sistemi colturali tradizionali, prevenzione del consumo di suolo | 146,46                   | 140,00          | 150,00          |
| AP.SD.35                                                | Programma di sostegno nel settore vitivinicolo – Investimenti                                                                                                                              | EFS                                        | Uso razionale delle risorse energetiche                                                     | 62,81                    | 45,00           | 60,00           |
| AP.SD.36                                                | Programma di sostegno nel settore vitivinicolo - Distillazione dei sottoprodotti                                                                                                           | EFS                                        | Riutilizzo dei residui, riduzione dei rifiuti                                               | 17,92                    | 20,00           | 20,00           |
| AP.SD.38                                                | Sostegno specifico per i seminativi: leguminose da granella, in particolare pisello, fava, favino, favetta, lupino, fagiolo, cece, lenticchia e vecce, ed erbai annuali di sole leguminose | EFS                                        | Allungamento della vita utile del suolo agricolo, prevenzione del consumo di suolo          | 11,49                    | 11,35           | 11,20           |
| AP.SD.39                                                | Aiuti nel settore apistico                                                                                                                                                                 | EFS                                        | Risparmio di risorse energetiche e materiali                                                | 6,10                     | 6,10            | 6,10            |
| AP.SD.41                                                | Produzione zootecnica estensiva (zone montane e zone colpite da terremoti)                                                                                                                 | EFS                                        | Allungamento della vita di ecosistemi di pregio e prevenzione del consumo di suolo          | 7,00                     | -               | 10,00           |
| <b>Total direct FCE in Agriculture and Fisheries</b>    |                                                                                                                                                                                            |                                            |                                                                                             | <b>2.716,57</b>          | <b>2.584,08</b> | <b>2.654,63</b> |
| <b>TOTAL FCE subsidies in Agriculture and Fisheries</b> |                                                                                                                                                                                            |                                            |                                                                                             | <b>2.720,37</b>          | <b>2.587,98</b> | <b>2.657,23</b> |

**Table S8 - "Other subsidies" – Friendly subsidies for the circular economy (FCE)**

| Subsidy code<br>(Catalogue) | Title                                                                                                                                                                                                                  | Environmental qualification<br>(Catalogue) | CE qualification<br>(CE principles favoured by the subsidy)                   | Financial impact (mln €) |          |          |
|-----------------------------|------------------------------------------------------------------------------------------------------------------------------------------------------------------------------------------------------------------------|--------------------------------------------|-------------------------------------------------------------------------------|--------------------------|----------|----------|
|                             |                                                                                                                                                                                                                        |                                            |                                                                               | 2017                     | 2018     | 2019     |
| INDIRECT SUBSIDIES          |                                                                                                                                                                                                                        |                                            |                                                                               |                          |          |          |
| AL.SI.15                    | Detrazione del 36% per gli interventi di restauro, risanamento conservativo e ristrutturazione edilizia su interi fabbricati da imprese e cooperative edilizie che procedono alla successiva alienazione dell'immobile | EFS                                        | Risparmio di suolo, risparmio di risorse materiali                            | 143,00                   | 143,00   | 143,00   |
| AL.SI.16                    | Detrazione del 50% o 65% per vari interventi di riqualificazione energetica degli edifici esistenti di qualsiasi categoria catastale, anche rurale, posseduti o detenuti                                               | EFS                                        | Risparmio energetico, risparmio di suolo                                      | 1.397,20                 | 1.619,60 | 1.847,60 |
| AL.SI.17                    | Detrazione maggiorata per gli interventi di riqualificazione energetica sulle parti comuni degli edifici condominiali                                                                                                  | EFS                                        | Risparmio energetico, risparmio di suolo                                      | -                        | 22,50    | 50,10    |
| AL.SI.18                    | Detrazione per interventi relativi all'adozione di misure antisismiche (parti strutturali)                                                                                                                             | EFS                                        | Risparmio di suolo, risparmio di risorse materiali                            | -                        | 340,00   | 608,40   |
| AL.SI.20                    | Detrazione del 36% per la sistemazione a verde di aree scoperte private di edifici esistenti, unità immobiliari, pertinenze o recinzioni (bonus verde).                                                                | EFS                                        | Rigenerazione e ripristino di suolo naturale                                  | -                        | 6,50     | d.q.     |
| AL.SI.21                    | Credito di imposta per la ripresa economica nei territori interessati dagli eventi sismici del 24 agosto 2016                                                                                                          | EFS                                        | Risparmio di suolo, risparmio di risorse materiali                            | 100,00                   | 200,00   | 200,00   |
| AL.SI.22                    | Credito d'imposta per la riqualificazione degli stabilimenti termali                                                                                                                                                   | EFS                                        | Risparmio di suolo, risparmio di risorse materiali, risparmio energetico      | -                        | d.q.     | d.q.     |
| AL.SI.23                    | Disposizioni in materia di interventi di bonifica da amianto                                                                                                                                                           | EFS                                        | Rimozione di sostanza chimica che impedisce riciclaggio                       | 5,47                     | 5,47     | 5,47     |
| AL.SI.25                    | Disposizioni per favorire le politiche di prevenzione nella produzione di rifiuti (possibilità per i Comuni di introdurre agevolazioni TARI in base al risparmio della produzione di rifiuti)                          | EFS                                        | Prevenzione produzione di rifiuti                                             | d.q.                     | d.q.     | d.q.     |
| AL.SI.26                    | Trattamento del rifiuto tramite compostaggio aerobico (riduzione TARI)                                                                                                                                                 | EFS                                        | Prevenzione produzione di rifiuti, recupero e riciclaggio di rifiuti organici | d.q.                     | d.q.     | d.q.     |
| AL.SI.27                    | Disposizioni per favorire la diffusione del compostaggio dei rifiuti organici (riduzione TARI)                                                                                                                         | EFS                                        | Prevenzione produzione di rifiuti, recupero e riciclaggio di rifiuti organici | d.q.                     | d.q.     | d.q.     |
| AL.SI.28                    | Riduzione della tariffa relativa alla tassa sui rifiuti delle utenze non domestiche che producono, distribuiscono e cedono prodotti alimentari a indigenti, finalizzata a evitare lo spreco alimentare                 | EFS                                        | Prevenzione produzione di rifiuti, incremento dell'uso dei prodotti           | d.q.                     | d.q.     | d.q.     |
| AL.SI.29                    | Credito d'imposta per acquisti di prodotti realizzati con plastiche miste riciclate (plasmix)                                                                                                                          | EFS                                        | Sostituzione di materie prime vergini con materie prime riciclate             | -                        | 1,00     | 1,00     |
| AL.SI.30                    | Esenzione dal reddito imponibile delle somme destinate a incremento del capitale proprio degli operatori bancari di finanza etica e sostenibile                                                                        | EFS                                        | Coerenza generale                                                             | -                        | 1,00     | 1,00     |
| AL.SI.31<br>Nuovo sussidio  | Credito di imposta all'impresa venditrice di merce che recupera dall'acquirente e riutilizza gli imballaggi usati                                                                                                      | EFS                                        | Riuso degli imballaggi, uso efficiente delle risorse                          | d.q.                     | d.q.     | d.q.     |
| AL.SI.32<br>Nuovo sussidio  | Agevolazioni fiscali sui prodotti da riciclo e riuso (credito d'imposta pari al 25% del costo di acquisto di prodotti intermedi riciclati almeno al 75% o di compost)                                                  | EFS                                        | Sostituzione di materie prime vergini con materie prime riciclate             | d.q.                     | d.q.     | d.q.     |
| AL.SI.33<br>Nuovo sussidio  | Credito di imposta nella misura del 36 per cento delle spese sostenute e documentate dalle imprese che acquistano prodotti realizzati con materiali provenienti dalla                                                  | EFS                                        | Sostituzione di materie prime vergini con materie prime                       | d.q.                     | d.q.     | d.q.     |

[illegible]

**Table S9 - “VAT allowances” – Friendly subsidies for the circular economy (FCE)**

[illegible]
